# Supplementary material for: Sandwiching Phosphorene with Iron Porphyrin Monolayer for High Stability and Its Biomimetic Sensor to Sensitively Detect Living Cell Released NO
Source: PubMed Central journal article supplement (PMC8867151; doi:10.1002/advs.202104066), 2022-01-02
Supplement: ADVS-9-2104066-s001.pdf [file ADVS-9-2104066-s001.pdf]

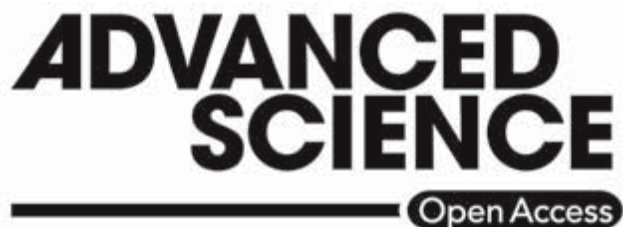

## Supporting Information

for *Adv. Sci.*, DOI: 10.1002/advs.202104066

### **Sandwiching Phosphorene with Iron Porphyrin Monolayer for High Stability and Its Biomimetic Sensor to Sensitively Detect Living Cell Released NO**

*Chunmei Zhang, Fangxin Hu, Xijuan Hao, Qianghai Rao, Tao Hu, Wei Sun, Chunxian Guo\**,  
*Chang Ming Li \**

Dr. C. Zhang, Dr. F. Hu, X. Hao, Q. Rao, Dr. T. Hu, Prof. C. Guo, Prof. C. M. Li  
Institute of Materials Science and Devices, School of Materials Science and Engineering, Suzhou  
University of Science and Technology, Kerui Road, Suzhou 215009, P.R. China  
E-mail: [cxguo@usts.edu.cn](mailto:cxguo@usts.edu.cn)

Prof. W. Sun, College of Chemistry and Chemical Engineering, Hainan Normal University,  
Haikou 571158, P R China

Prof. C. M. Li  
Institute for Clean Energy & Advanced Materials, Faculty of Materials and Energy, Southwest  
University, Chongqing 400715, P.R. China  
E-mail: [ecmli@swu.edu.cn](mailto:ecmli@swu.edu.cn)

### Experimental Section

*Chemicals and reagents:* Hemin ( $C_{34}H_{32}ClFeN_4O_4$ ,  $\geq 95\%$ ) was acquired from Sigma-Aldrich.  
Isopropyl alcohol (IPA,  $C_3H_8O$ ,  $\geq 99.7\%$ ) was purchased from Jiangsu Qiangsheng Functional  
Chemistry Co., Ltd. Phosphorene was customized from Nanjing Xianfeng Nanomaterials

## Supporting Information

**Sandwiching Phosphorene with Iron Porphyrin Monolayer for High Stability and Its Biomimetic Sensor to Sensitively Detect Living Cell Released NO**

*Chunmei Zhang, Fangxin Hu, Xijuan Hao, Qianghai Rao, Tao Hu, Wei Sun, Chunxian Guo\*, Chang Ming Li \**

Dr. C. Zhang, Dr. F. Hu, X. Hao, Q. Rao, Dr. T. Hu, Prof. C. Guo, Prof. C. M. Li  
Institute of Materials Science and Devices, School of Materials Science and Engineering,  
Suzhou University of Science and Technology, Kerui Road, Suzhou 215009, P.R. China  
E-mail: [cxguo@usts.edu.cn](mailto:cxguo@usts.edu.cn)

Prof. W. Sun, College of Chemistry and Chemical Engineering, Hainan Normal University,  
Haikou 571158, P R China

Prof. C. M. Li  
Institute for Clean Energy & Advanced Materials, Faculty of Materials and Energy,  
Southwest University, Chongqing 400715, P.R. China  
E-mail: [ecmli@swu.edu.cn](mailto:ecmli@swu.edu.cn)

## Experimental Section

*Chemicals and reagents:* Hemin ( $C_{34}H_{32}ClFeN_4O_4$ ,  $\geq 95\%$ ) was acquired from Sigma-Aldrich. Isopropyl alcohol (IPA,  $C_3H_8O$ ,  $\geq 99.7\%$ ) was purchased from Jiangsu Qiangsheng Functional Chemistry Co., Ltd. Phosphorene was customized from Nanjing Xianfeng Nanomaterials Technology Co., Ltd with a low concentration of  $0.2 \text{ mg mL}^{-1}$  (1-10 layers), which was prepared by liquid phase exfoliation in a week. Before the use, phosphorene was further sonicated in an ice bath for at least half an hour. Phosphate buffer solution (PBS,  $0.1 \text{ mol L}^{-1}$ , pH 7.4) was prepared using  $NaH_2PO_4$  and  $Na_2HPO_4$ . All chemicals used were at least analytical reagent grade, and the solutions were prepared by ultrapure water ( $18.25 \text{ M}\Omega/\text{cm}$ ).

*Synthesis of sandwiched iron porphyrin monolayer-sandwiched phosphorene (I-Phene):* I-Phene was prepared by the self-assembly process without adding any surfactants. 1 mL Phosphorene in IPA ( $0.2 \text{ mg mL}^{-1}$ ) was added into 6 mL hemin dispersed in IPA under nitrogen

protection. Afterward, the mixture was stirred for 48 h under a nitrogen atmosphere. After that, the suspension was centrifuged at 10000 rpm for 10 min to obtain the final product.

*Preparation of nitric oxide (NO) saturated PBS:* NO saturated PBS solution was prepared in a fume hood according to the previous reported study.<sup>[1]</sup> Briefly, 2 M H<sub>2</sub>SO<sub>4</sub> was cautiously added dropwise into saturated NaNO<sub>2</sub> solution in a round bottom flask under the condition of continuous stirring. The produced NO was passed through saturated KOH, 10% (w/v) KOH and 2.5% (w/v) KOH, respectively, to remove other nitrogen oxides produced from the reaction. Finally, NO was bubbled in 0.1 M PBS solution until to reach saturation state (1.8 mM). The NO saturated PBS solution should be stored in a nitrogen-protected environment and was kept at 4 °C for further use.

*Material characterizations:* UV-vis spectra were obtained from a UV-2600 spectrophotometer. Transmission electron microscopy (TEM) and high resolution TEM (HRTEM) images were obtained from FEI Talos F200x (TEM). The aberration-corrected scanning transmission electron microscopy (AC-STEM) images were obtained on FEI Titan Themis 60-300. X-ray powder diffraction (XRD) patterns were collected on a Bruker D8 Advance X-ray diffractometer using a Cu K $\alpha$  radiation source scanning from 10° to 60° with a rate of 5° min<sup>-1</sup>. Atomic force microscopy (AFM) was performed on a Bruker Dimension Icon AFM, and the thickness measured was based on 30 statistics. X-ray photoelectron spectroscopy (XPS) tests were conducted on a VG Thermo ESCALAB 250 spectrometer operated at 120 W. The binding energies were all calibrated by the carbon 1 s at 284.6 eV. All characterizations in this study should be conducted as soon as possible, once samples were prepared.

*Fabrication of electrochemical sensor and electrochemical measurements:* Before electrode modification with materials, glassy carbon (GC) electrodes were polished using alumina powder (0.3 and 0.05  $\mu$ m in diameter) followed by washing and sonication to obtain a mirror surface. The phosphorene and I-Phene were modified on GC for further use.

All electrochemical measurements were conducted on a CHI 660E electrochemical workstation with a standard three-electrode system. The sample modified GC electrode, an Ag/AgCl electrode and a platinum wire were used as the working, reference and counter electrodes, respectively. Before the electrochemical measurements, the PBS solution should be first degassed by N<sub>2</sub> to remove O<sub>2</sub>. 0.1 M (pH = 7.4) phosphate buffer solution (PBS) prepared by NaH<sub>2</sub>PO<sub>4</sub> and Na<sub>2</sub>HPO<sub>4</sub> was used as the electrolyte in the electrochemical experiments. Cyclic voltammograms (CVs) were tested in the potential range from 0 to 1.0 V at the scan rate of 20 mV s<sup>-1</sup> in N<sub>2</sub> saturated PBS solution. Differential pulse voltammetry (DPV) was performed in the potential range from 0.4 to 1.0 V. Amperometric measurements (i-t curves) were tested in N<sub>2</sub> saturated PBS (0.1 M, pH = 7.4) solution under stirring.

*Cell culture and in situ detection of NO:* Human cervical cancer cells (Hela) was obtained from Rayme Biotechnology Co., Ltd. Hela were supplemented with 10% fetal bovine serum and 1% antibiotic and cultured in a humidified incubator (95% air with 5% CO<sub>2</sub>) at 37 °C with complete culture medium. Real-time detection of NO released from living cells was measured by chronoamperometry. Hemoglobin (Hb) as a kind of NO-synthase inhibitor can inhibit the generation of NO effectively.

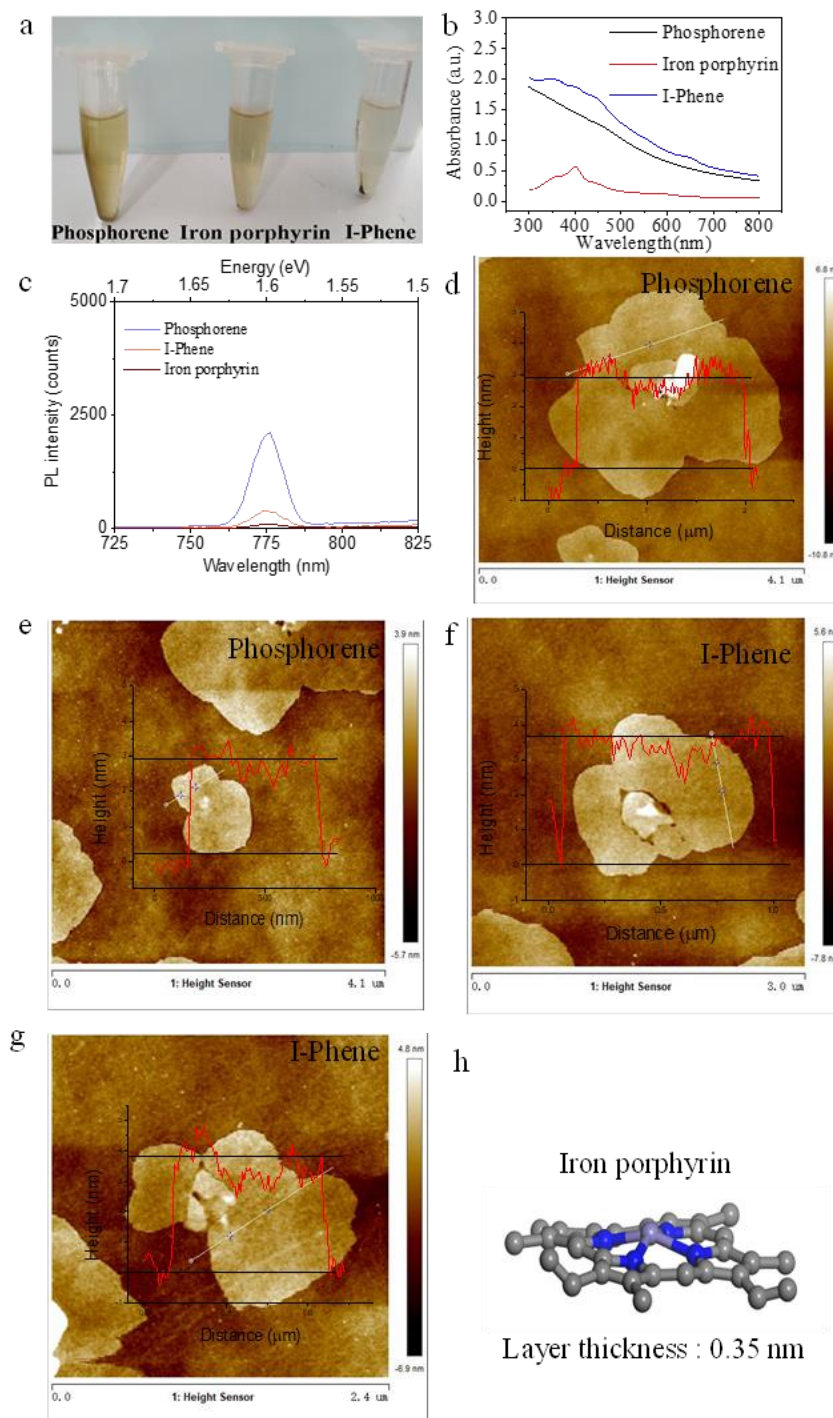

**Figure S1.** a) The pictures of phosphorene, iron porphyrin and I-Phene after centrifugation at 10000 rpm for 10 min. b) UV-visible spectra of phosphorene, iron porphyrin and I-Phene in IPA solution. c) Photoluminescence spectra acquired on phosphorene, I-Phene and iron

porphyrin. AFM images of phosphorene d-e) and I-Phene f-g). Thickness of iron porphyrin calculated by Materials Studio h).

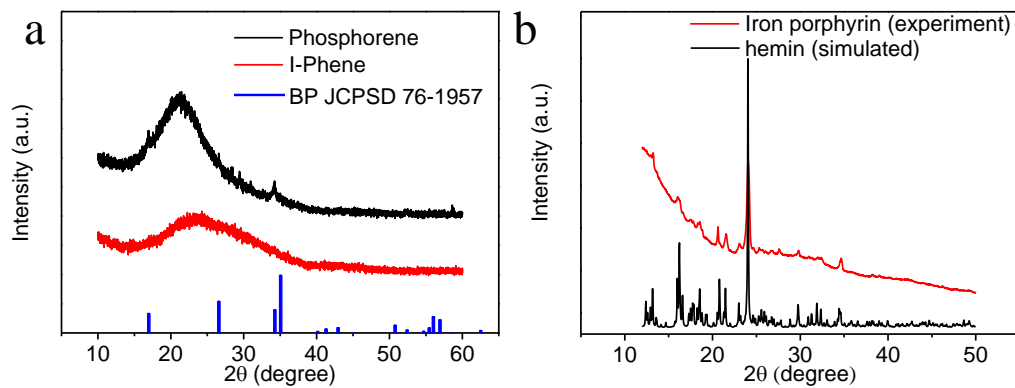

**Figure S2.** XRD pattern of a) phosphorene, I-Phene and the standard pattern (blue) of BP in JCPDS NO. 76-1957 and b) iron porphyrin (experiment) and hemin (simulated).

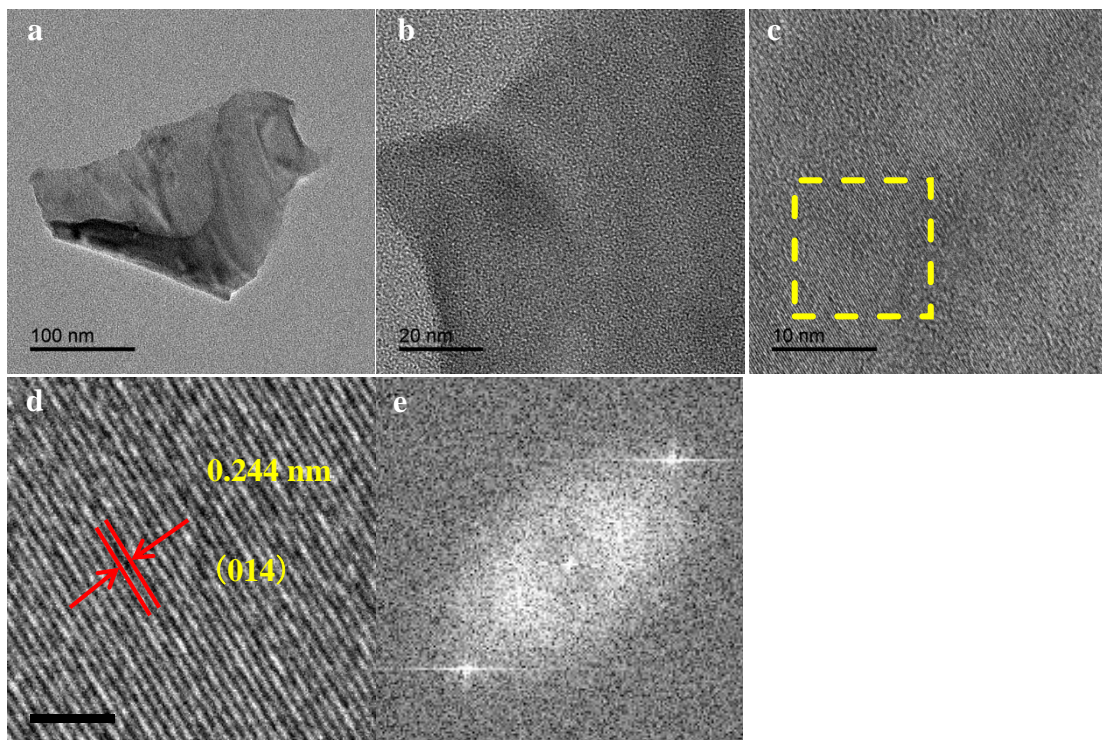

**Figure S3.** a) TEM and b-d) HRTEM images of phosphorene. d) is the enlarge image of c) in yellow square. e) is the FFT of c) in yellow square.

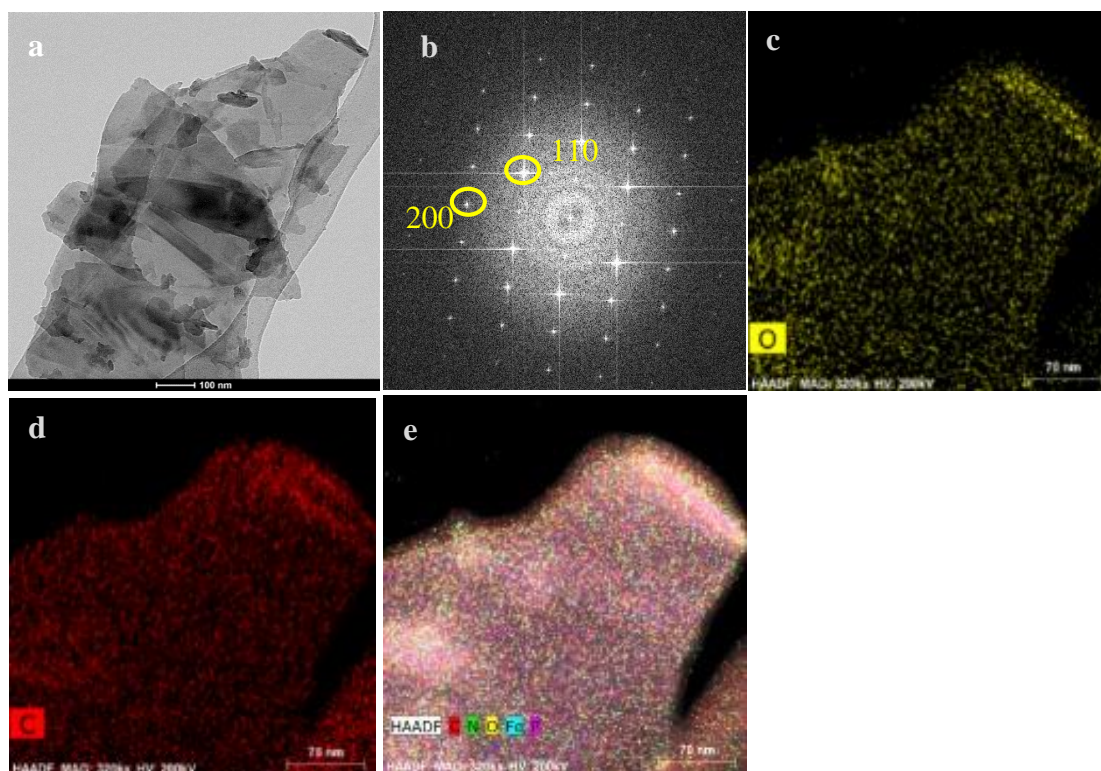

**Figure S4.** a) TEM, b) the corresponding FFT images of I-Phene, c-e) the corresponding elemental mappings of O, C and the overlap image of all elements for I-Phene, scale bars are 70 nm.



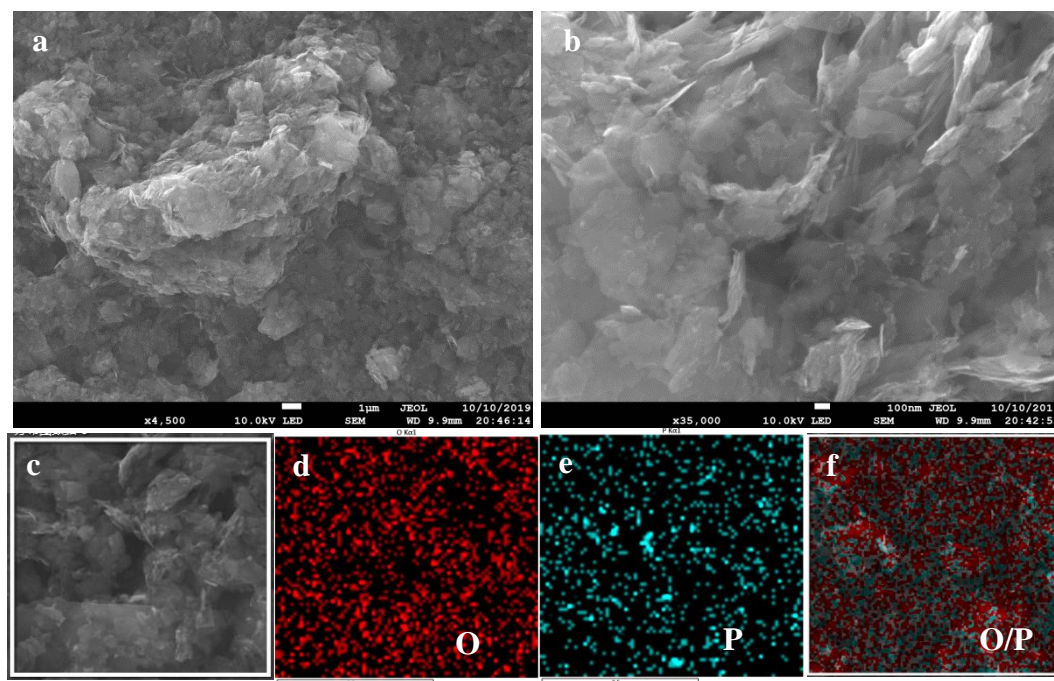

**Figure S5.** a-b) SEM images at different magnification of phosphorene. c-f) Elemental mappings.

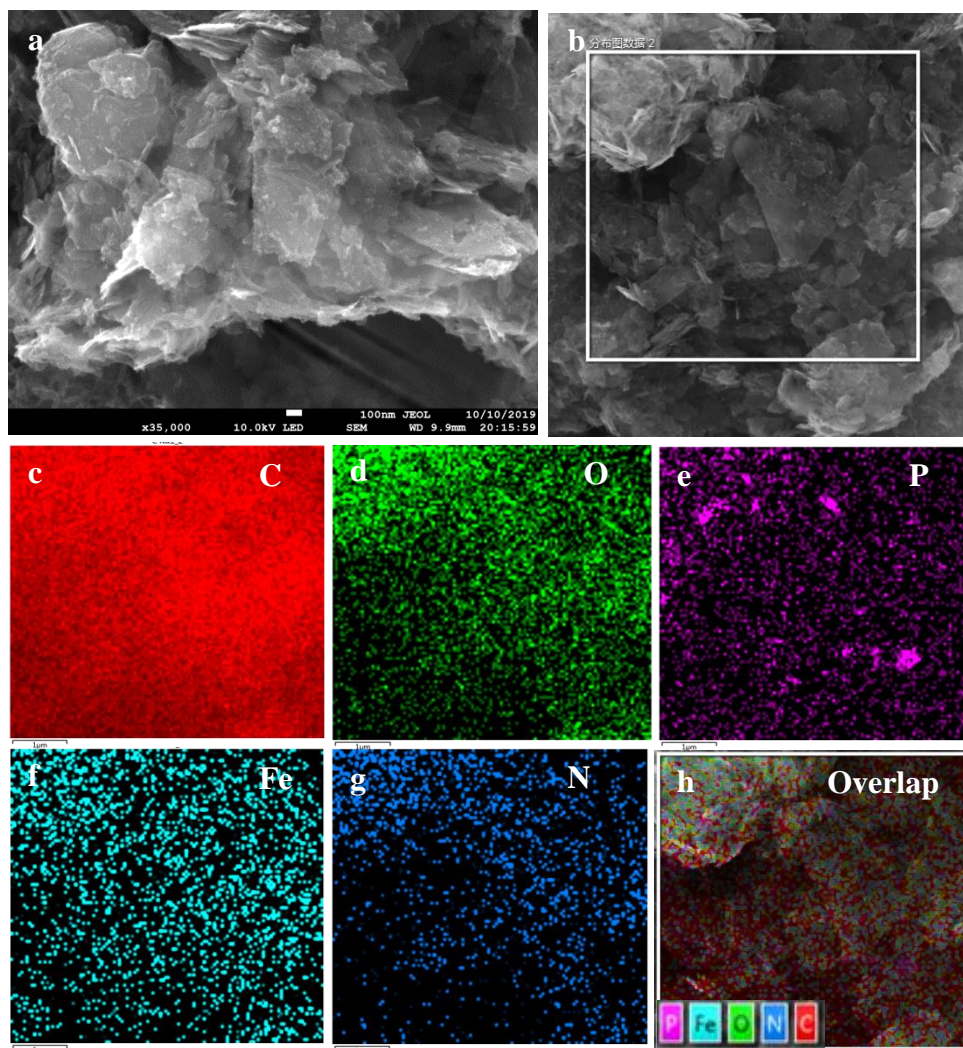

**Figure S6.** a) SEM image of I-Phene. b-h) Elemental mappings.

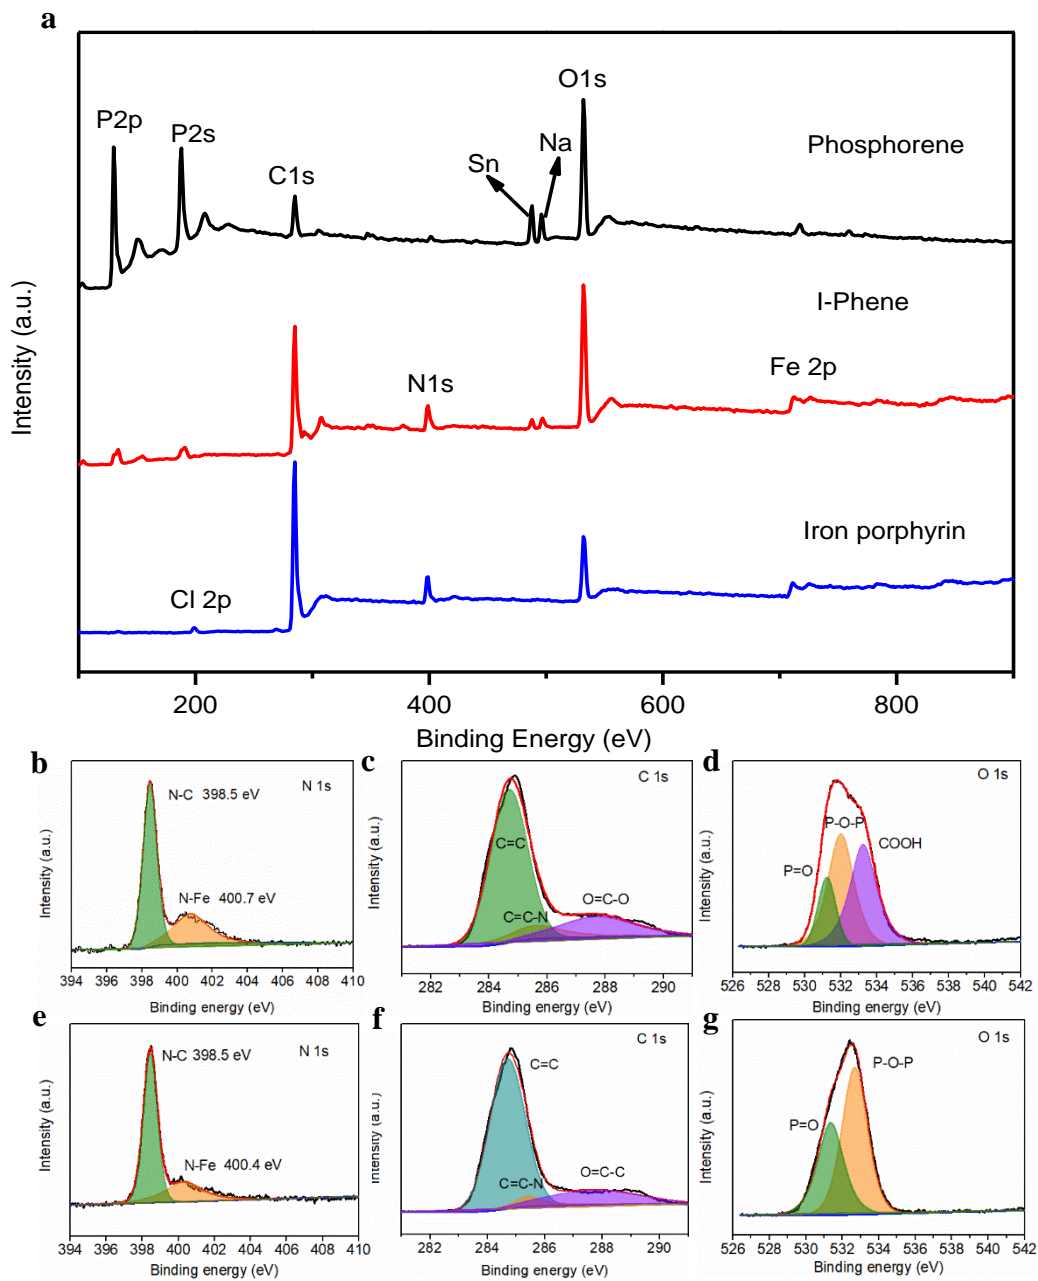

**Figure S7.** a) XPS survey spectra of phosphorene, I-Phene and iron porphyrin. High-resolution XPS survey of b) N 1s and c) C 1s and d) O 1s in I-Phene, e) N 1s and f) C 1s in iron porphyrin, g) O 1s in phosphorene.

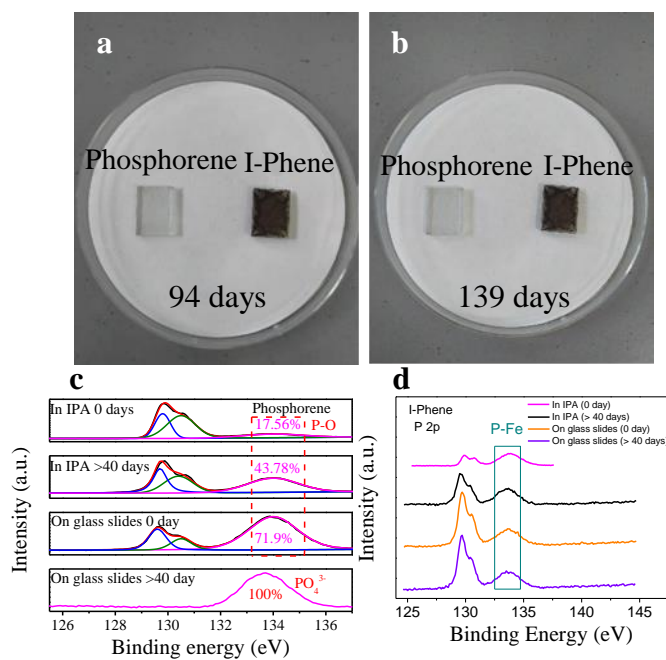

**Figure S8.** Pictures of phosphorene and I-Phene exposed in air after a) 94 days and b) 139 days. P 2p XPS surveys of phosphorene c) and I-Phene d) stored in IPA and on glass slides for different days.

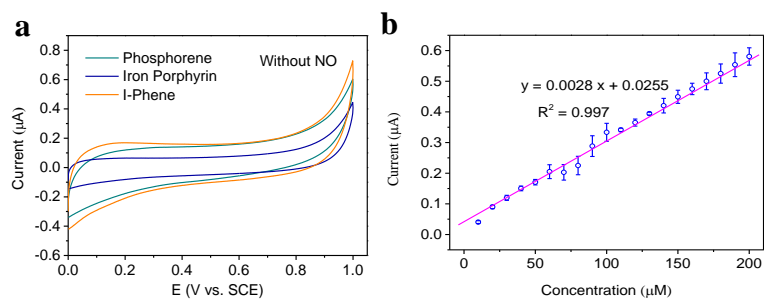

**Figure S9.** a) CV of f phosphorene, iron porphyrin and I-Phene in  $\text{N}_2$ -saturated 0.1 M PBS without NO. b) Corresponding calibration curve of I-Phene for NO detection by CV measurements.

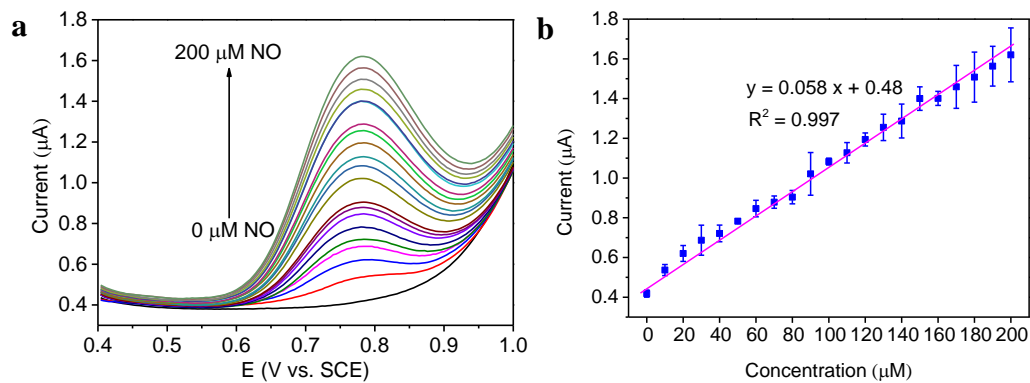

**Figure S10.** a) DPV of I-Phene to different concentrations of NO. b) Calibration curves of the I-Phene to NO.

**Table S1.** Comparison for different materials of the previous studies and this work.

| Materials                                     | Detection potential (V) | Linear range ( $\mu\text{M}$ )          | LOD ( $\mu\text{M}$ ) | References |
|-----------------------------------------------|-------------------------|-----------------------------------------|-----------------------|------------|
| Cu <sub>2</sub> O@FePO <sub>4</sub> core-cage | 0.97                    | 1.35-337.0 nM<br>1.6-13.5 $\mu\text{M}$ | 0.00045               | [2]        |
| N-G/FePc/Nafion/PLL ITO                       | 0.9                     | 0.18-400 $\mu\text{M}$                  | 0.18                  | [3]        |
| Au/PDMS                                       | 0.85                    | 0.01-1.295                              | 0.001                 | [4]        |
| Au NPs-3DGH                                   | 0.81                    | 0.2-6                                   | 0.009                 | [5]        |
| Graphene-gold                                 | 0.8                     | 10-5000                                 | 0.04                  | [6]        |
| rGO-Ag nanocomposite                          | 0.96                    | 10-220                                  | 2.84                  | [7]        |
| rGO-Co <sub>3</sub> O <sub>4</sub> @Pt        | 0.84                    | 10-650                                  | 1.73                  | [8]        |
| rGO-CeO <sub>2</sub>                          | -                       | 0.018 -5.6                              | 0.0096                | [9]        |
| I-Phene                                       | 0.82                    | 0.02-243.65<br>243.65-683.65            | 0.006                 | This work  |

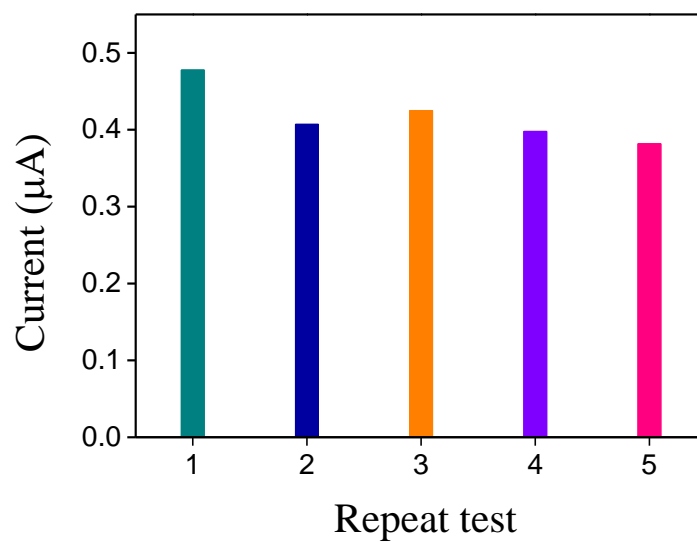

**Figure S11.** Electrochemical stability of I-Phene toward NO sensing.



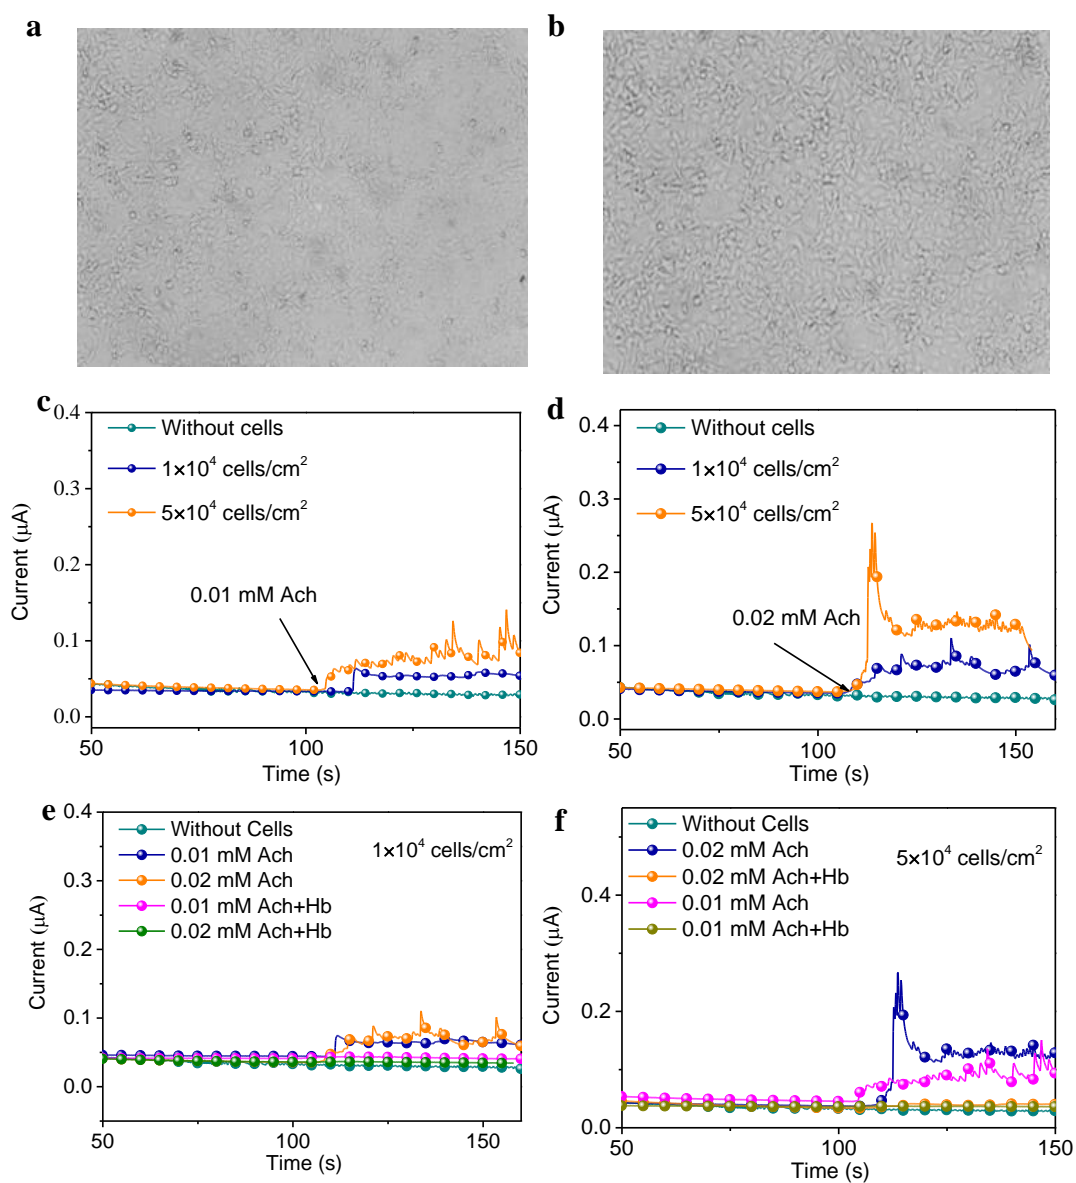

**Figure S12.** Pictures of different concentrations of HeLa cells a)  $1 \times 10^4$  cells/cm<sup>2</sup> and b)  $5 \times 10^4$  cells/cm<sup>2</sup>. I-Phene Stimulated by c) 0.01 mM and d) 0.02 mM of ACh, e)  $1 \times 10^4$  cells/cm<sup>2</sup> and f)  $5 \times 10^4$  cells/cm<sup>2</sup>.

## References

- [1] C. M. Li, J. Zang, D. Zhan, W. Chen, C. Q. Sun, A. L. Teo, Y. T. Chua, V. S. Lee, S. M. Moochhala, *Electroanalysis*, **2006**, *18*, 713.
- [2] Y. Zhang, S. Y. Lu, Z. Shi, Z. L. Zhao, Q. Liu, J. C. Gao, T. Liang, Z. Zou, C. M. Li, *Nanoscale*, **2019**, *11*, 4471.

- [3] H. Xu, C. Liao, Y. Liu, B. C. Ye, B. Liu, *Anal. Chem.*, **2018**, *90*, 4438.
- [4] X. Zhao, K. Wang, B. Li, C. Wang, Y. Ding, C. Li, L. Mao, Y. Lin, *Anal. Chem.*, **2018**, *90*, 7158.
- [5] J. Li, J. Xie, L. Gao, C. M. Li, *ACS Appl. Mater. Inter.*, **2015**, *7*, 2726.
- [6] R. Geetha Bai, K. Muthoosamy, M. Zhou, M. Ashokkumar, N. M. Huang, S. Manickam, *Biosens. Bioelectron.*, **2017**, *87*, 622.
- [7] N. I. Ikhsan, P. Rameshkumar, N. M. Huang, *RSC Adv.*, **2016**, *6*, 107141.
- [8] M. M. Shahid, P. Rameshkumar, A. Pandikumar, H. N. Lim, Y. H. Ng, N. M. Huang, *J. Mater. Chem. A*, **2015**, *3*, 14458.
- [9] F. X. Hu, J. L. Xie, S. J. Bao, L. Yu, C. M. Li, *Biosens. Bioelectron.*, **2015**, *70*, 310.
